# Supplementary material for: Packing directed beneficial role of 3-D rigid alicyclic arms on the templated molecular aggregation problem
Source: Royal Society of Chemistry journal article supplement (doi:10.1039/c5ra08231e), 2015-01-01
Supplement: c5ra08231e1.pdf [file c5ra08231e1.pdf]

# Packing Directed Beneficial Role of 3-D Rigid Alicyclic Arms on Templated Molecular Aggregation Problem

Sunil Kumar,<sup>a</sup> Punita Singh,<sup>b</sup> Ritu Srivastava, Subrata Ghosh<sup>a,\*</sup>

<sup>a</sup>*School of Basic Sciences, Indian Institute of Technology Mandi, Mandi-175001, H.P, India*

<sup>b</sup>*Physics of Energy Harvesting Division, National Physical Laboratory, New Delhi, India*

## Synthesis.

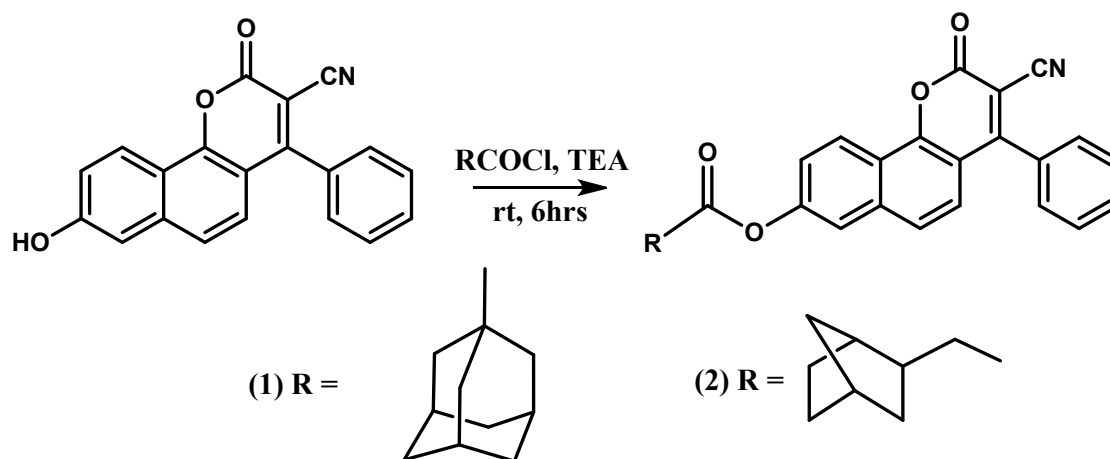

**Scheme S1.** Synthesis pathway to compound **1** and compound **2**.

**Compound 1.** To a dichloromethane suspension of hydroxyl coumarin (1eq) was added triethylamine (2.5 eq) followed by the addition of 1-adamantanecarbonyl chloride (1eq) at 0°C and reaction mixture was then stirred at room temperature for 6 hours. Progress of reaction was checked using thin layer chromatography (TLC). Reaction mixture was extracted with dichloromethane and washed with water (30ml x 3). Organic layer was dried over sodium sulfate

and concentrated over high vacuum. Light green compound was obtained as product after hexane washings.

$^1\text{H-NMR}$ :  $\delta/\text{ppm}$  (500 MHz,  $\text{CDCl}_3$ ) = 8.57 (d,  $J = 9.6$  Hz, 1H), 7.58 – 7.51 (m, 5H), 7.48 – 7.42 (m, 2H), 7.39 – 7.34 (m, 1H), 7.25 (d,  $J = 8.2$  Hz, 1H). 2.05 – 2.03 (m, 10H), 1.72 – 1.69 (m 5H).  $^{13}\text{C-NMR}$ :  $\delta/\text{ppm}$  (125 MHz,  $\text{CDCl}_3$ ) = 175.8, 164.7, 157.2, 152.8, 137.2, 132.1, 131.08, 129.2, 128.4, 125.1, 124.7, 123.6, 123.4, 120.4, 119, 113.7, 113.3, 100.5, 41.3, 38.7, 36.3, 27.8. IR:  $\nu_{\text{max}}/\text{cm}^{-1}$  = 3020, 2955, 2228, 1724, 1634, 1584, 1533, 1501, 1391.2, 1343, 1273, 1229, 1151, 1030, 880, 754. HRMS:  $m/z$  calculated for  $\text{C}_{31}\text{H}_{25}\text{NO}_4$  : Exact Mass: 475.1784 , found  $[\text{MH}]^+ = 476.1857$ ; M.P. =  $297^\circ\text{C}$ ; Yield = 69%.

**Compound 2.** To a tetrahydrofuran suspension of hydroxyl coumarin (1eq) was added triethylamine (2.5 eq) followed by the addition of 2-(bicyclo[2.2.1]heptan-2-yl)acetyl chloride (1.1eq) at  $0^\circ\text{C}$  and reaction mixture was then stirred at room temperature for 6 hours. Progress of reaction was checked using thin layer chromatography (TLC). Reaction mixture was extracted with ethyl acetate and washed with water (30ml x 3). Organic layer was dried over sodium sulfate and concentrated over high vacuum. Light green compound was obtained as product.

$^1\text{H-NMR}$ :  $\delta/\text{ppm}$  (500 MHz,  $\text{CDCl}_3$ ) = 8.63 (d,  $J = 9.6$  Hz, 1H), 7.65 – 7.60 (m, 5H), 7.53 – 7.51 (m, 2H), 7.46 – 7.44 (m, 1H), 7.32 (d,  $J = 8.9$  Hz, 1H). 2.63 – 2.59 (m, 1H), 2.48 – 2.43 (m, 1 H), 2.30 (bs, 1H), 2.13 – 2.12 (m, 1H), 2.08 – 2.05 (m, 1H), 1.63 – 1.51 (m, 4H), 1.40 – 1.38 (m, 1H), 1.31 – 1.25 (m, 1H), 1.21 – 1.19 (m, 3H).  $^{13}\text{C-NMR}$ :  $\delta/\text{ppm}$  (125 MHz,  $\text{CDCl}_3$ ) = 171.1, 164.6, 157.1, 152.3, 137.2, 132.1, 131.0, 129.2, 128.4, 125.1, 124.8, 123.6, 123.3, 120.5, 118.9, 113.7, 113.3, 100.5, 41.26, 41.22, 38.4, 37.7, 36.7, 35.2, 29.7, 28.4. IR:  $\nu_{\text{max}}/\text{cm}^{-1}$  = 3120, 2950, 2234, 1730, 1620, 1581.5, 1542.6, 1511, 1391, 1349, 1273, 1229, 1166, 1020.8, 873, 746.

HRMS:  $m/z$  calculated for  $C_{29}H_{23}NO_4$  Exact Mass: 449.1627, found  $[MH]^+ = 450.1699$ ,  $[M+Na]^+ = 472.1521$ . M.P. = 210°C; Yield = 65%.

### Synthesis of 2-(bicyclo[2.2.1]heptan-2-yl)acetyl chloride.

2-Norbornaneacetic acid (1eq) was dissolved in dry tetrahydrofuran and one drop of dimethylformamide was added. Thionyl chloride ( $SOCl_2$ , 2eq) was added dropwise at 0°C. Reaction mixture was then refluxed for 3 hours. Reaction mixture was then concentrated over vacuum to remove unreacted  $SOCl_2$  and kept under nitrogen. The yellow liquid obtained was used immediately without any purification.

**Table S1.** Crystal data and structure refinement for compound **2**.

|                                                                   | <b>Compound 2</b>                                         |
|-------------------------------------------------------------------|-----------------------------------------------------------|
| Empirical formula                                                 | $C_{29}H_{23}NO_4$                                        |
| Formula weight                                                    | 449.48                                                    |
| Crystal System                                                    | Monoclinic                                                |
| Space group                                                       | $P2_1/c$                                                  |
| $a/\text{Å}$                                                      | 31.1736(9)                                                |
| $b/\text{Å}$                                                      | 9.5651(2)                                                 |
| $c/\text{Å}$                                                      | 8.0016(3)                                                 |
| $\alpha, \beta, \gamma$ , deg                                     | 90, 91.296(3), 90.00                                      |
| Volume/ $\text{Å}^3$                                              | 2385.28(12)                                               |
| $Z, \rho_{\text{calc}}/\text{mg}/\text{mm}^3, \mu/\text{mm}^{-1}$ | 4, 1.252, 0.673                                           |
| Crystal size/ $\text{mm}^3$                                       | $0.3017 \times 0.087 \times 0.0558$                       |
| $2\theta$ range for data collection                               | 8.52 to 133.54°                                           |
| Index ranges                                                      | $-36 \leq h \leq 37, -11 \leq k \leq 3, -9 \leq l \leq 9$ |
| Reflections collected                                             | 7164                                                      |
| Independent reflections                                           | 4175 [ $R(\text{int}) = 0.0187$ ]                         |
| Data/restraints/parameters                                        | 4175/0/307                                                |
| Goodness-of-fit on $F^2$                                          | 1.050                                                     |
| Final R indexes [ $I \geq 2\sigma(I)$ ]                           | $R_1 = 0.0659, wR_2 = 0.1911$                             |
| Final R indexes [all data]                                        | $R_1 = 0.0783, wR_2 = 0.2066$                             |
| Largest diff. peak/hole / $e \text{ Å}^{-3}$                      | 0.39/-0.26                                                |

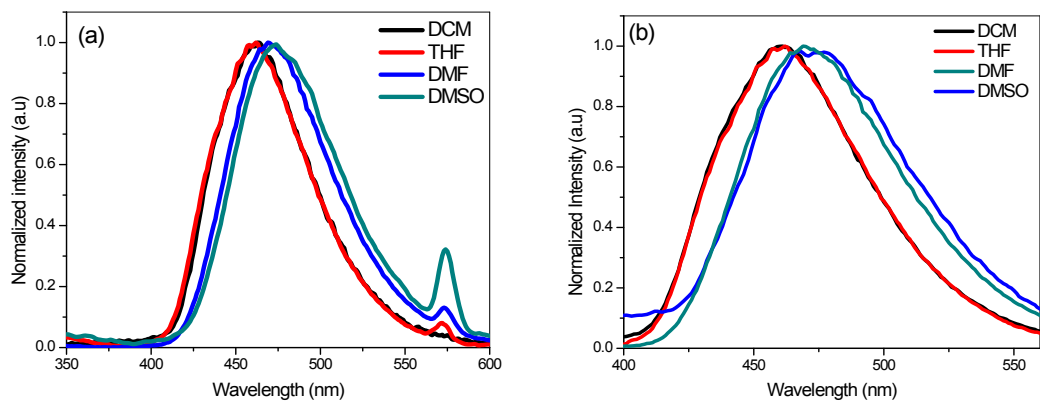

**Fig. S1** Photoluminescence solvatochromism spectra for (a) compound **1** and (b) **2**.

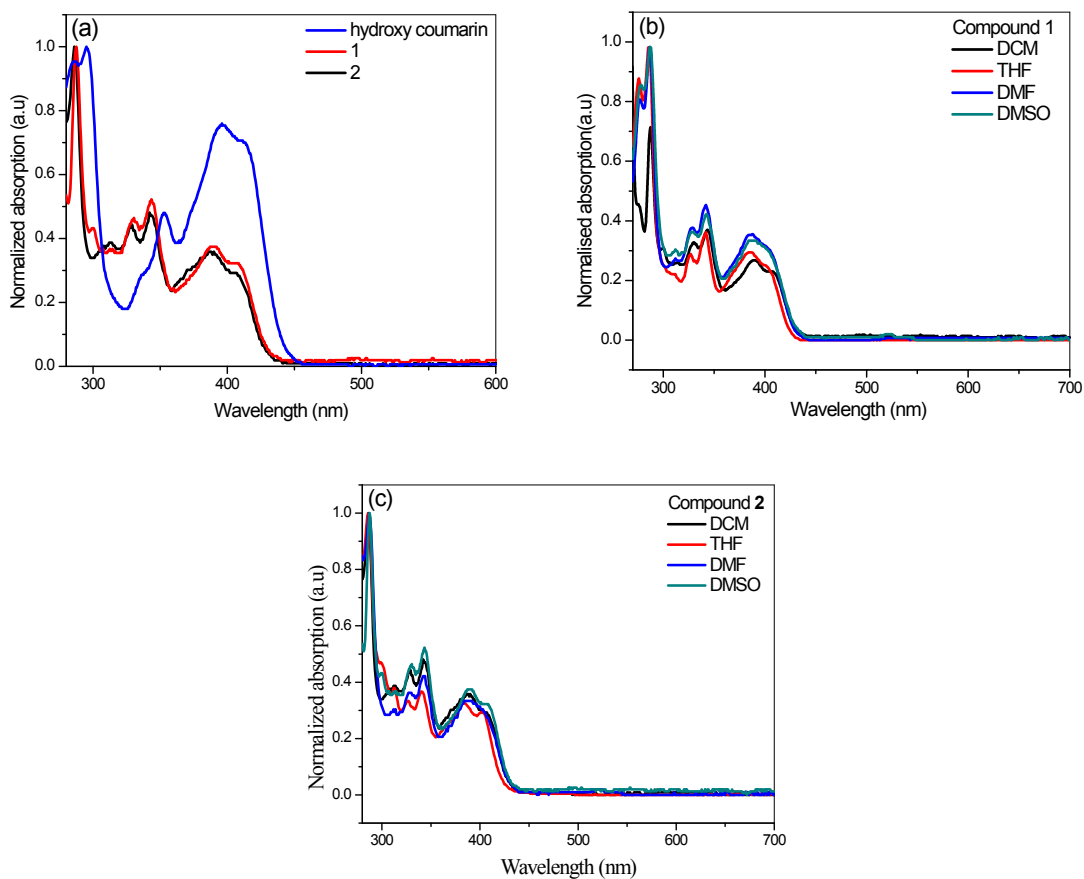

**Fig. S2** (a) Comparison of UV-vis absorption spectra of **1** and **2** with parent hydroxyl coumarin; (b) UV-vis absorption solvatochromism spectra for **1** and (c) UV-vis absorption solvatochromism spectra for **2**.

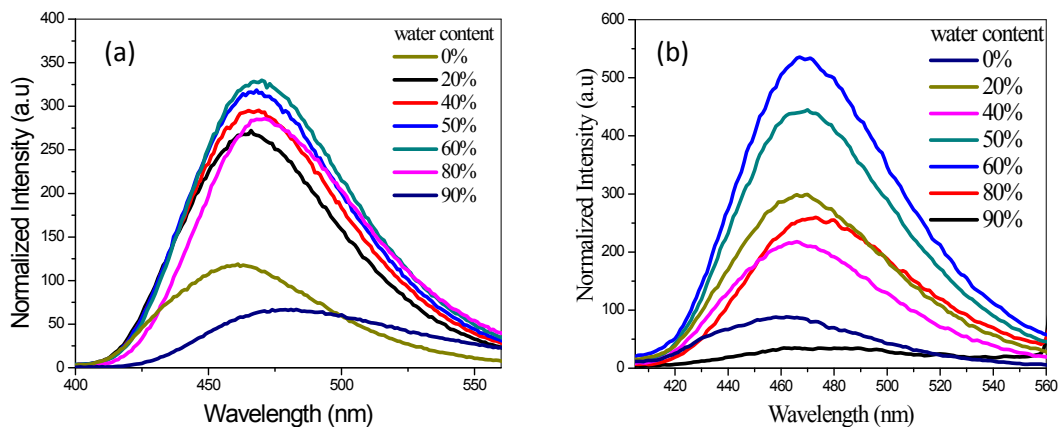

**Fig. S3.** PL changes in THF:water experiment with increasing water content for compounds **1** (a) and **2** (b).

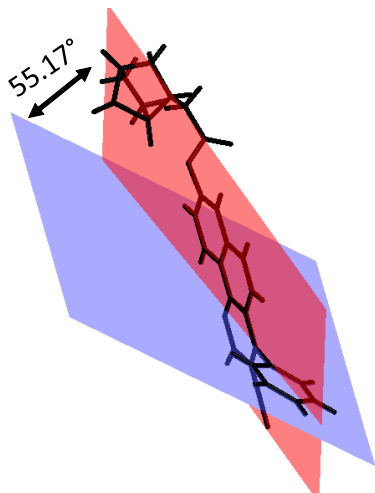

**Fig. S4** Interplanar angle between 2H-benzo[h]chromen-2-one core and phenyl moiety of compound **2**.

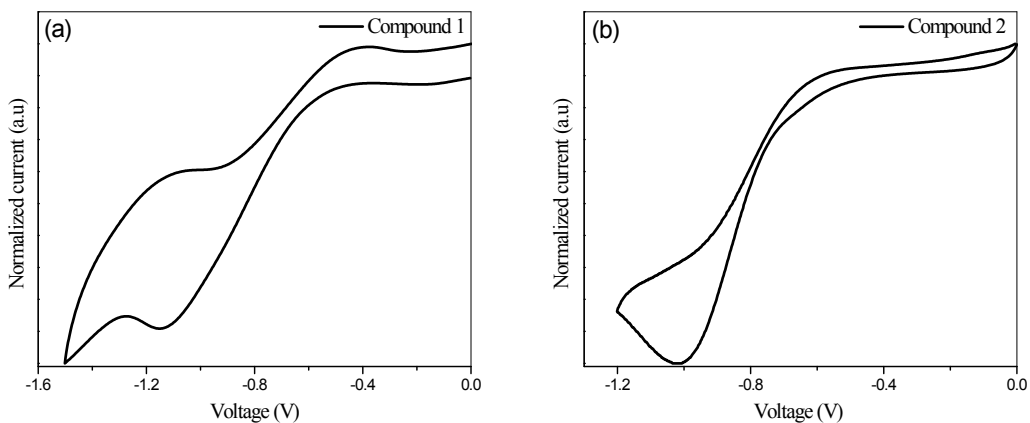

**Fig. S5** Cyclic voltammety curves showing reduction potential window for compound **1** and **2**. ( $E_{LUMO} = -(E_{red} + 4.8)$  eV, where  $E_{red}$  is the onset reduction potential relative to the (Fc/Fc<sup>+</sup>) couple.  $E_{1/2}$  (Fc/Fc<sup>+</sup>) = 0.58 eV (DCM) and 0.55 (ACN).  $E_{HOMO} = E_{LUMO} + E_g$ ).

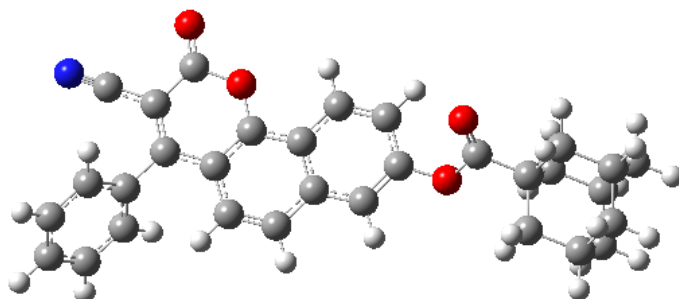

**Fig. S6** Optimized geometry of compound **1** calculated at B3LYP/6-311G (d,p) level of DFT.

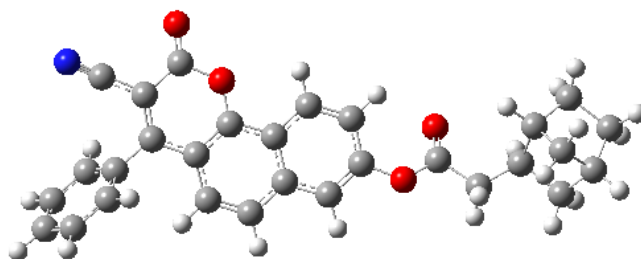

**Fig. S7** Optimized geometry of compound **2** calculated at B3LYP/6-311G (d,p) level of DFT.

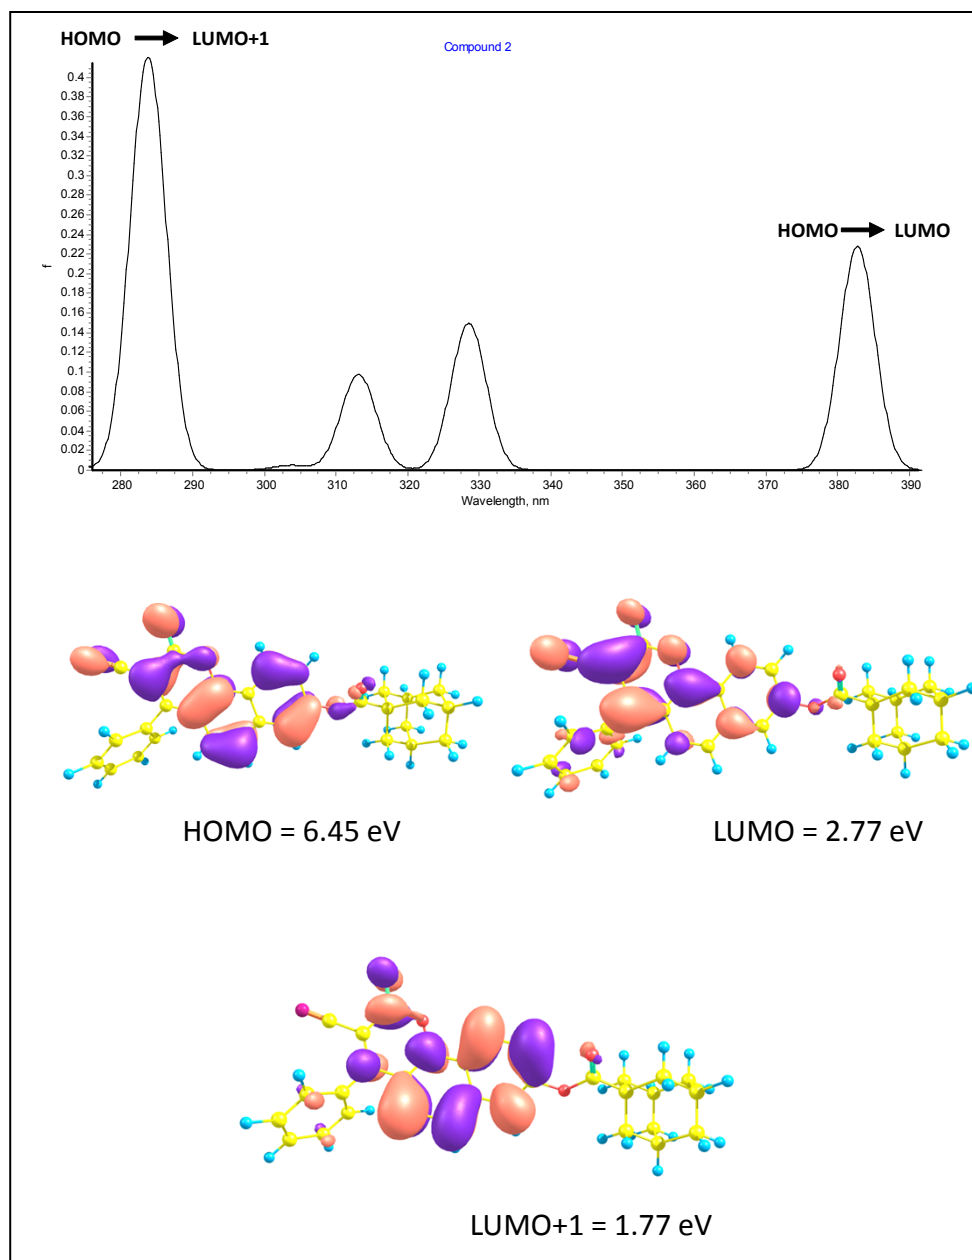

**Fig. S8** TD-DFT absorption spectra of compound 1 calculated atB3LYP/6-311G(d,p) level. Peaks are characterized with their major electronic transition. Orbitals involved in electronic transitions are also depicted.

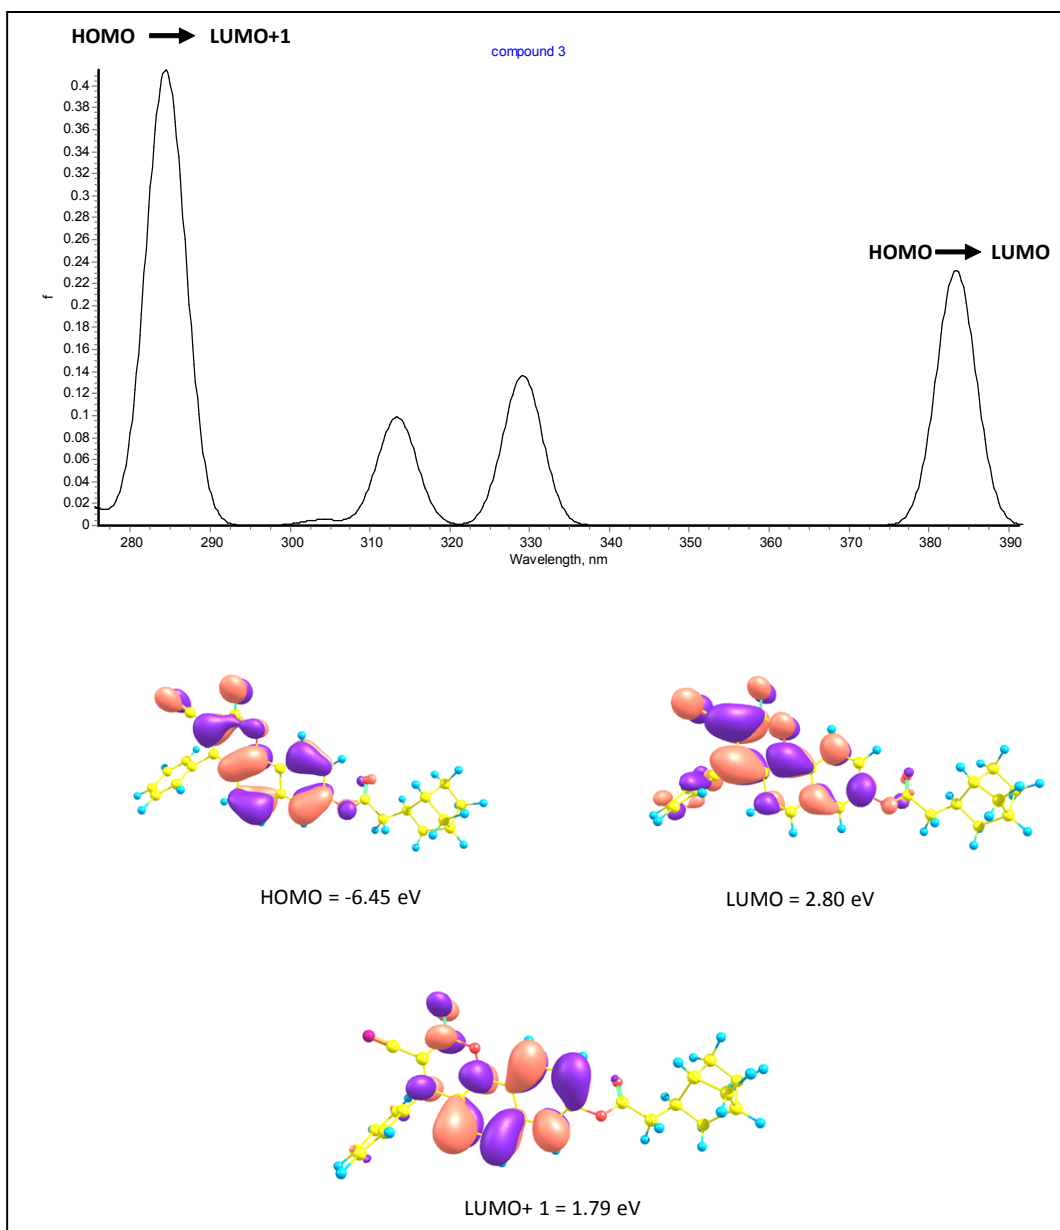

**Fig. S9** TD-DFT absorption spectra of compound 2 calculated at B3LYP/6-311G(d,p) level. Peaks are characterized with their major electronic transition. Orbitals involved in electronic transitions are also depicted.



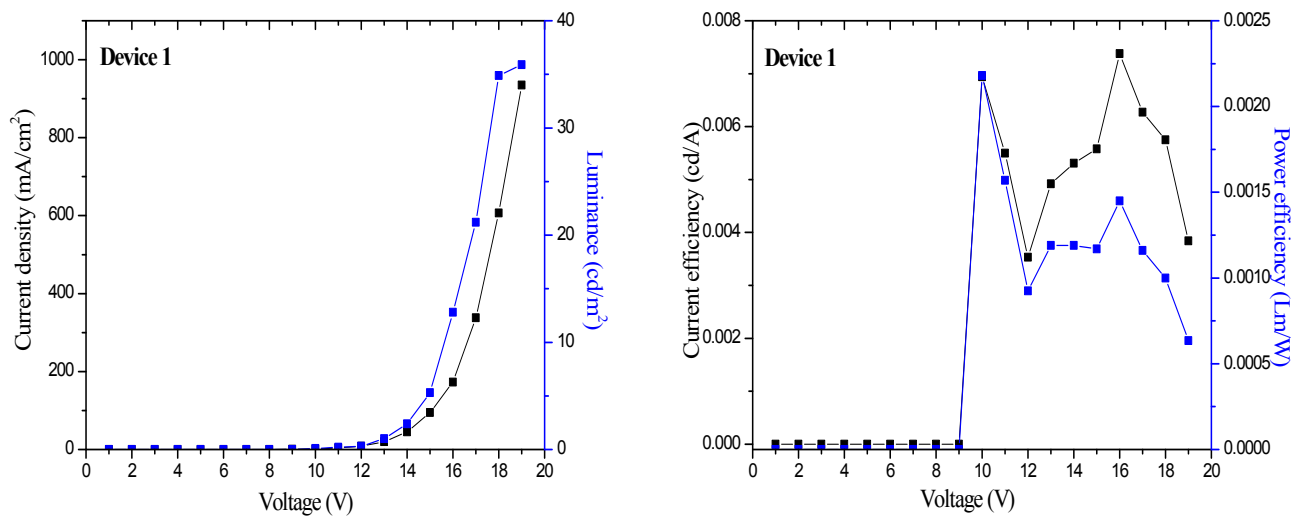

**Fig. S10** J–V–L characteristics (left) and Current efficiency–voltage and power efficiency–voltage (right) of Device 1.

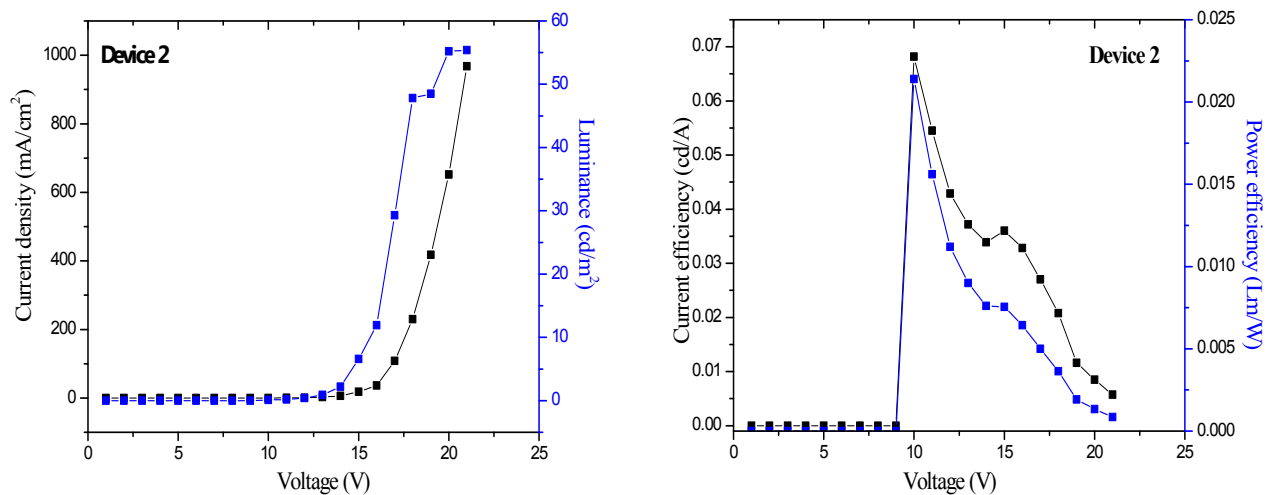

**Fig. S11** J–V–L characteristics (left) and Current efficiency–voltage and power efficiency–voltage (right) of Device 2.

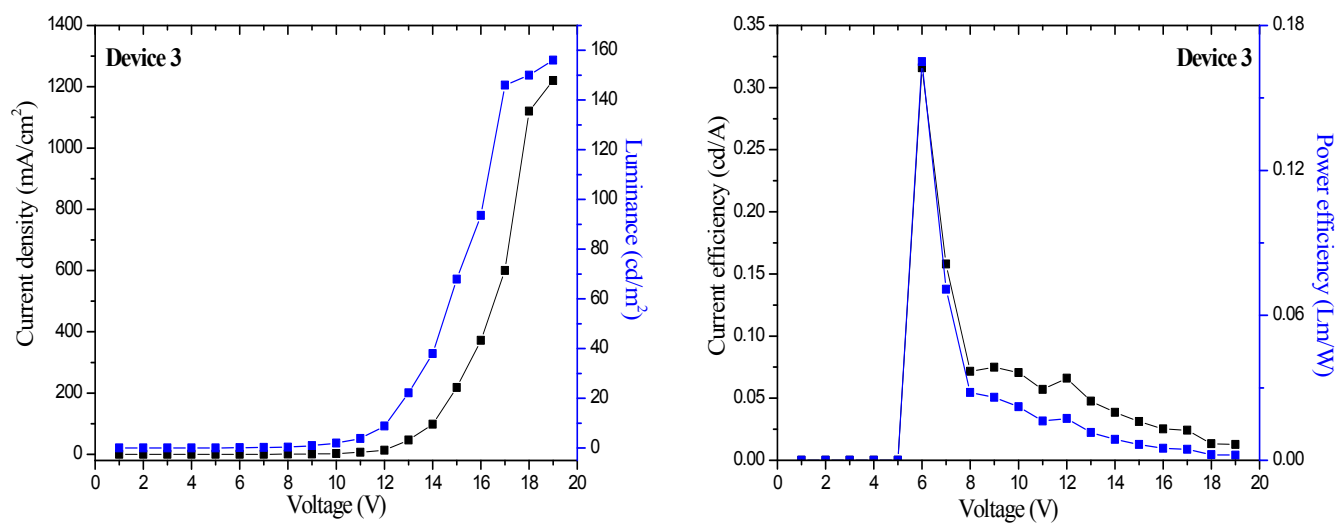

**Fig. S12** J–V–L characteristics (left) and Current efficiency–voltage and power efficiency–voltage (right) of Device 3.

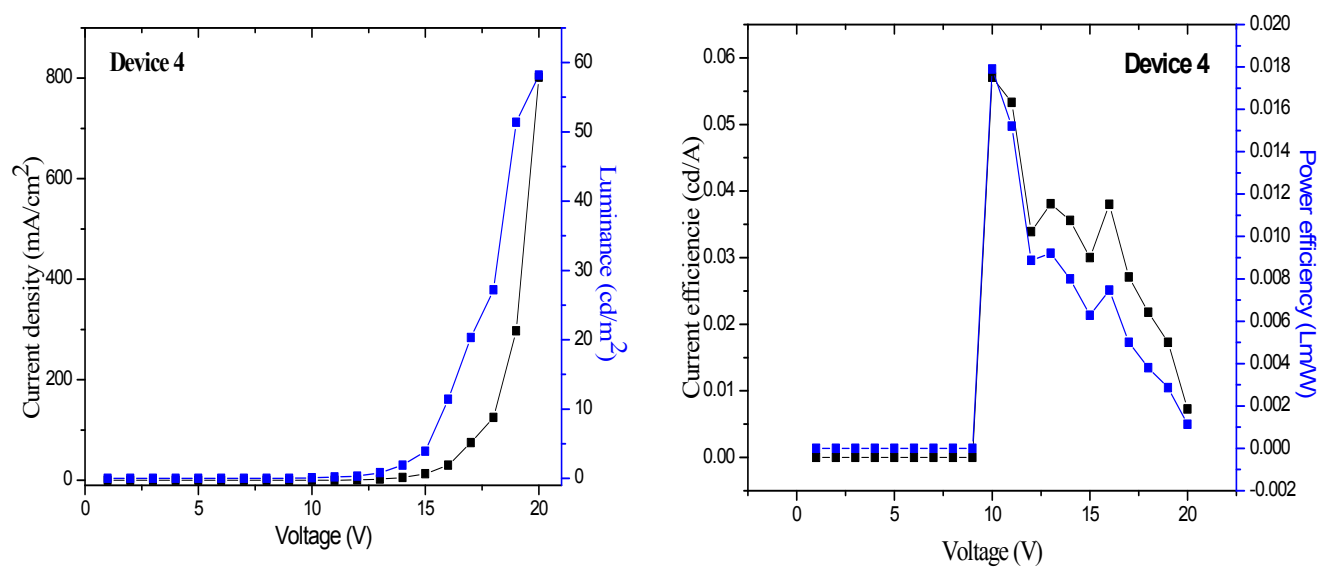

**Fig. S13** J–V–L characteristics (left) and Current efficiency–voltage and power efficiency–voltage (right) of Device 4.

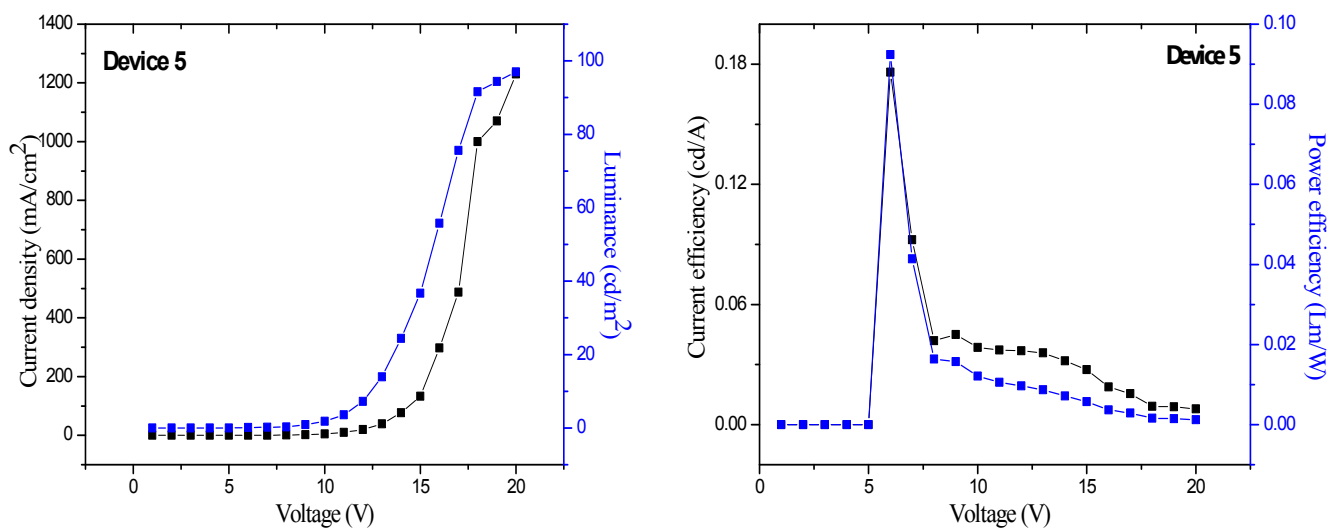

**Fig. S14** J–V–L characteristics (left) and Current efficiency–voltage and power efficiency–voltage (right) of Device 5.

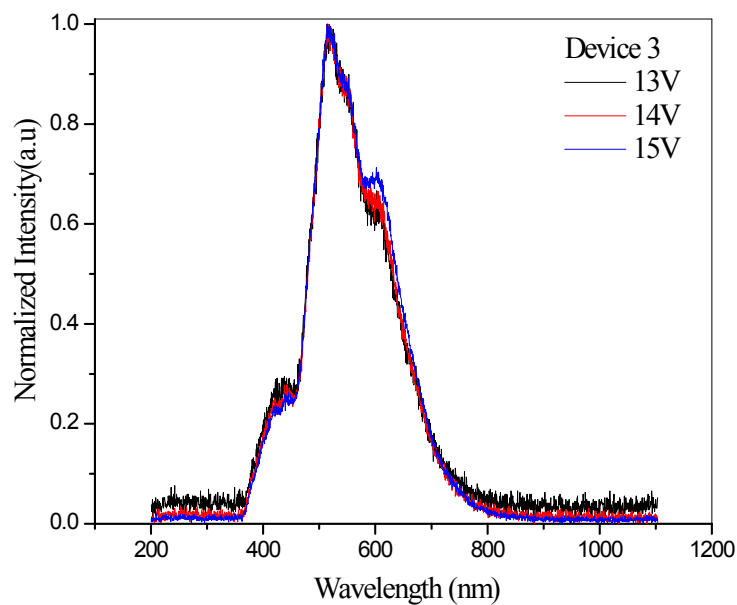

**Fig. S15** Electroluminescence spectrum of Device 3 at 13V, 14V and 15V.

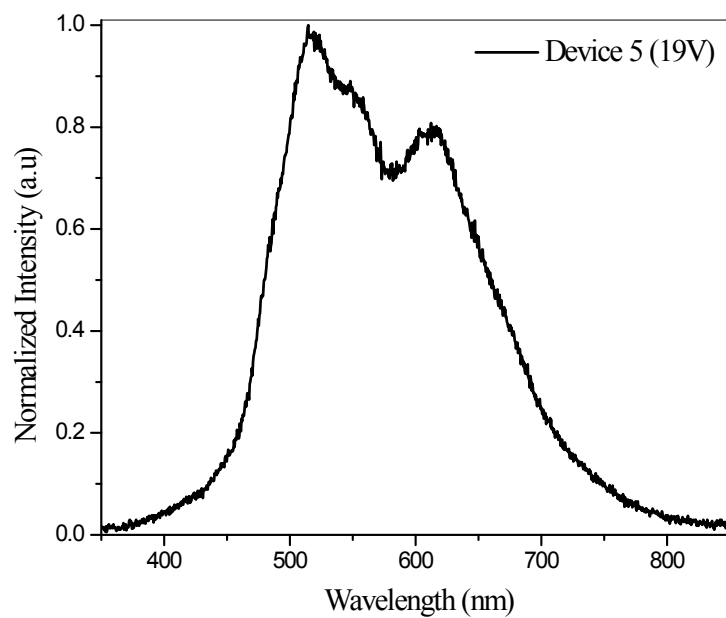

**Fig. S16** Electroluminescence spectrum of Device 5 at 19V.

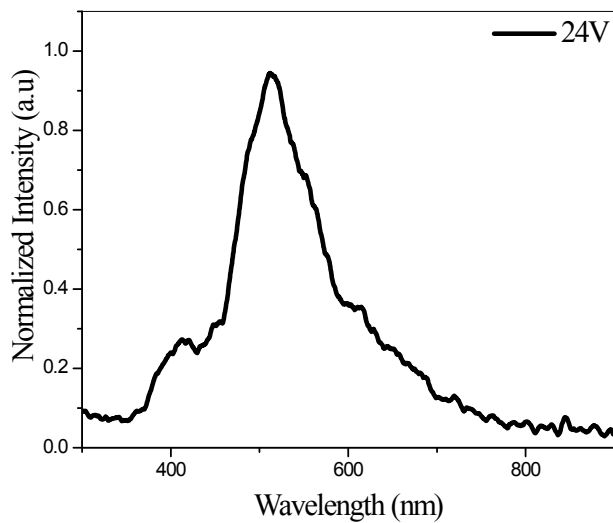

**Fig. S17** Electroluminescence spectrum of Device 6 at 24V.

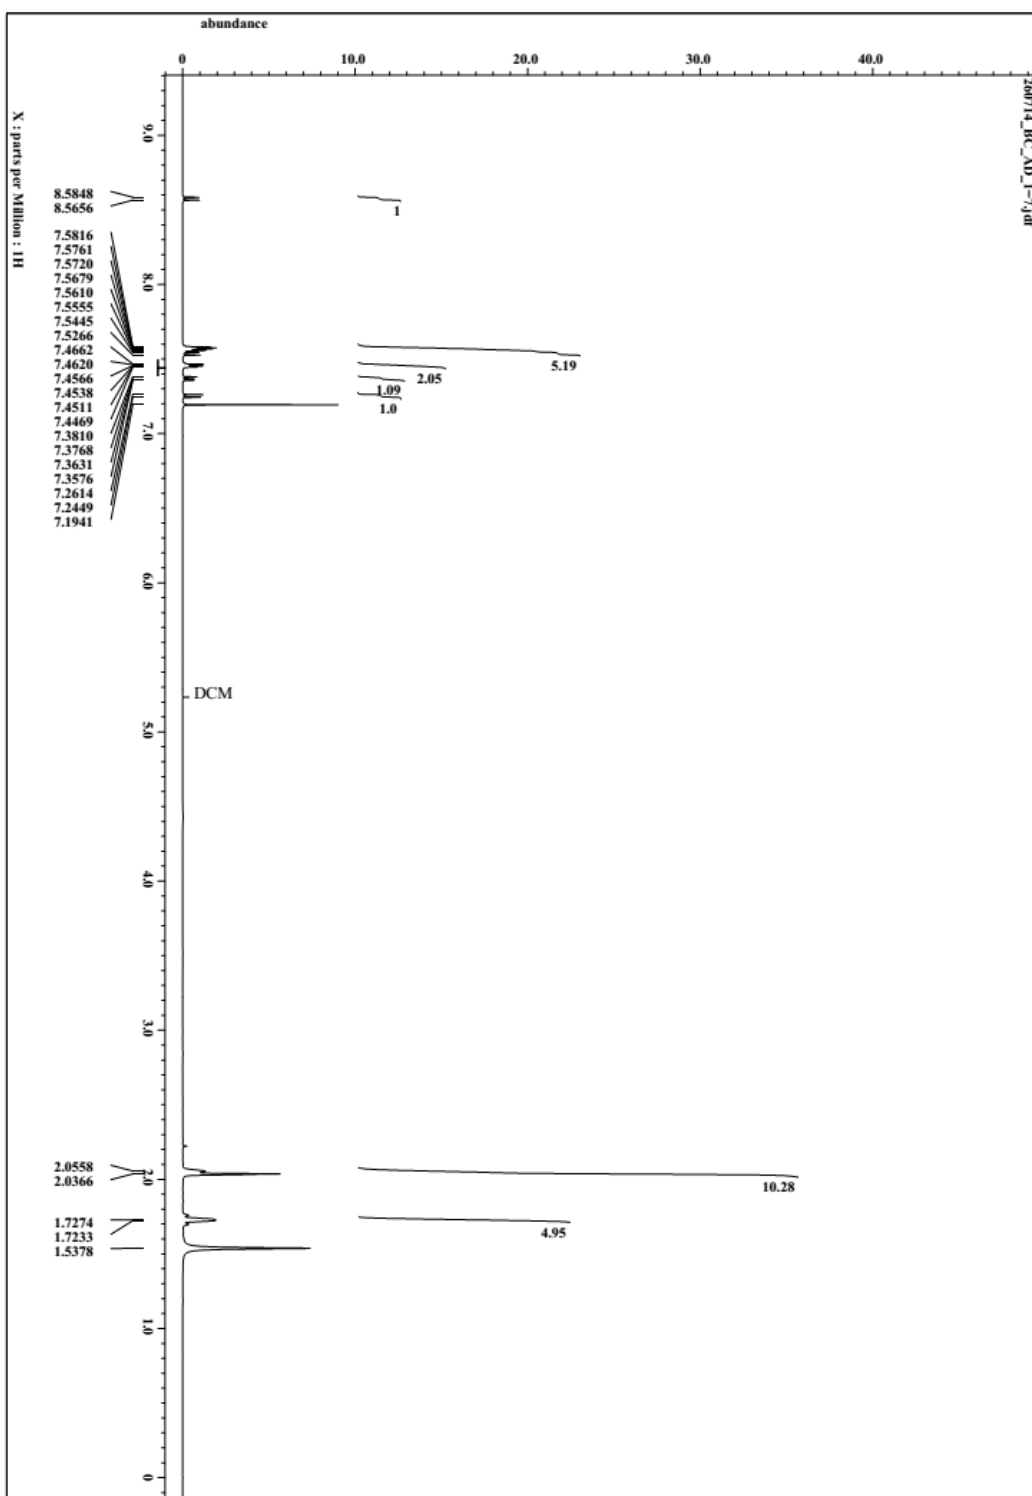

Fig. S18  $^1\text{H}$ -NMR spectrum of compound 1.

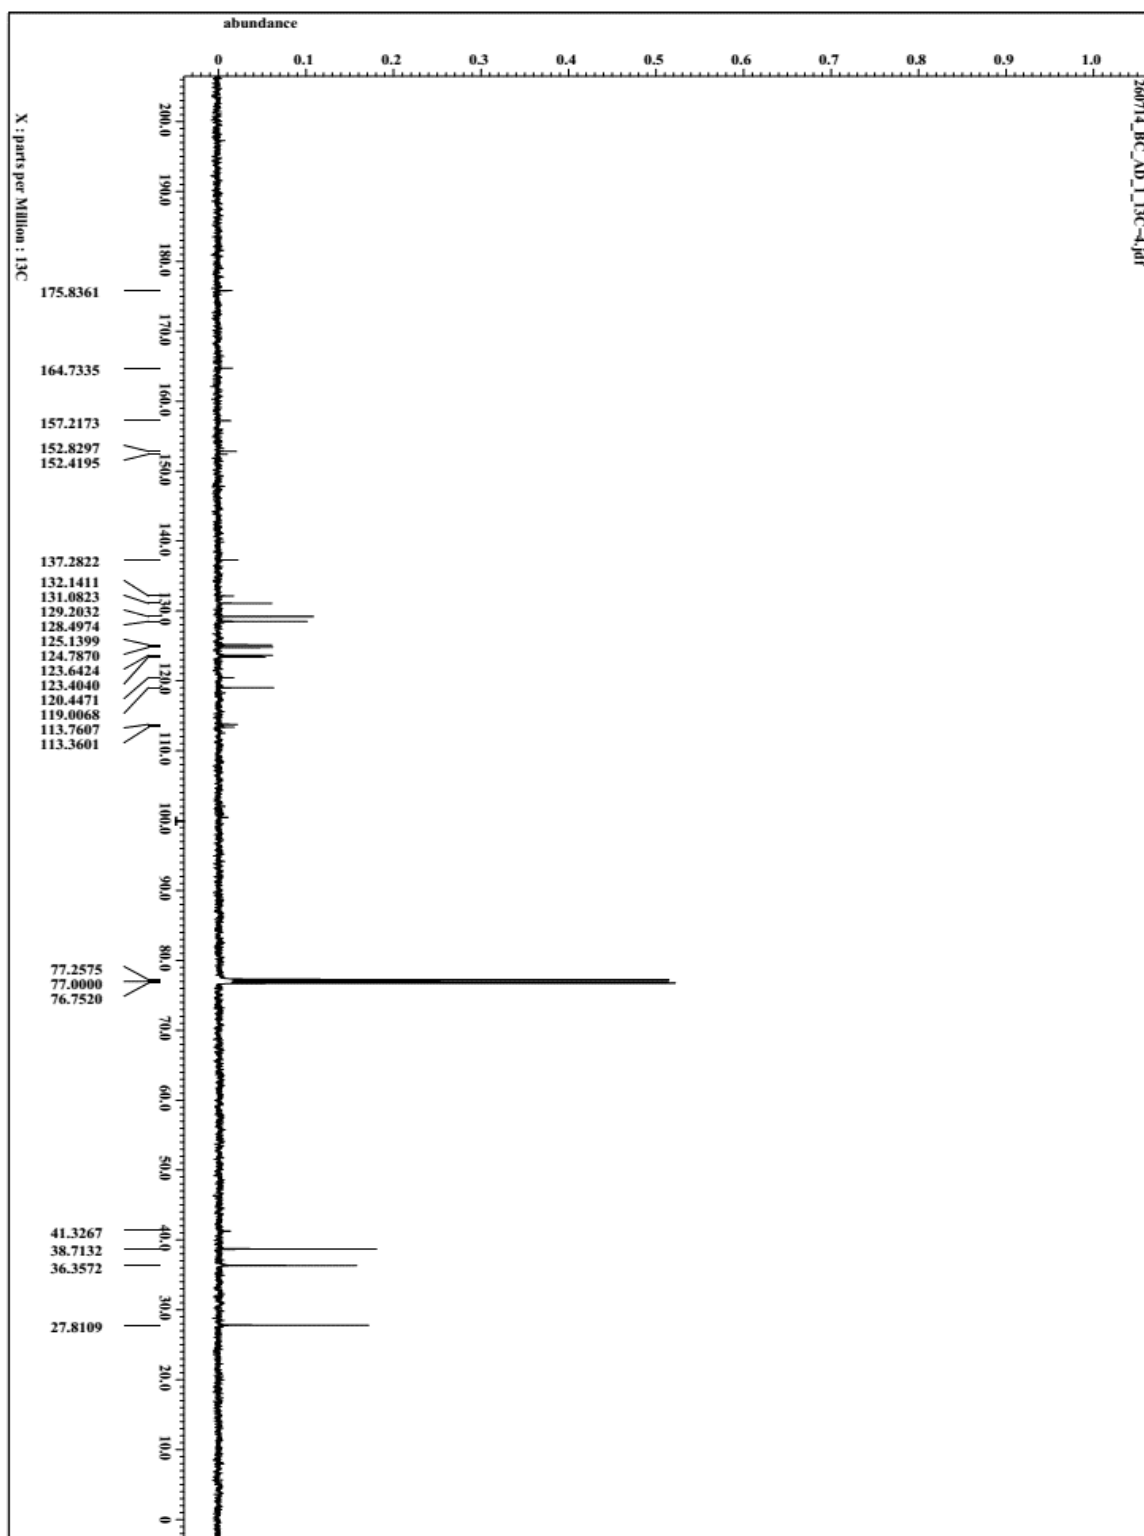

Fig. S19  $^{13}\text{C}$ -NMR spectrum of compound 1.

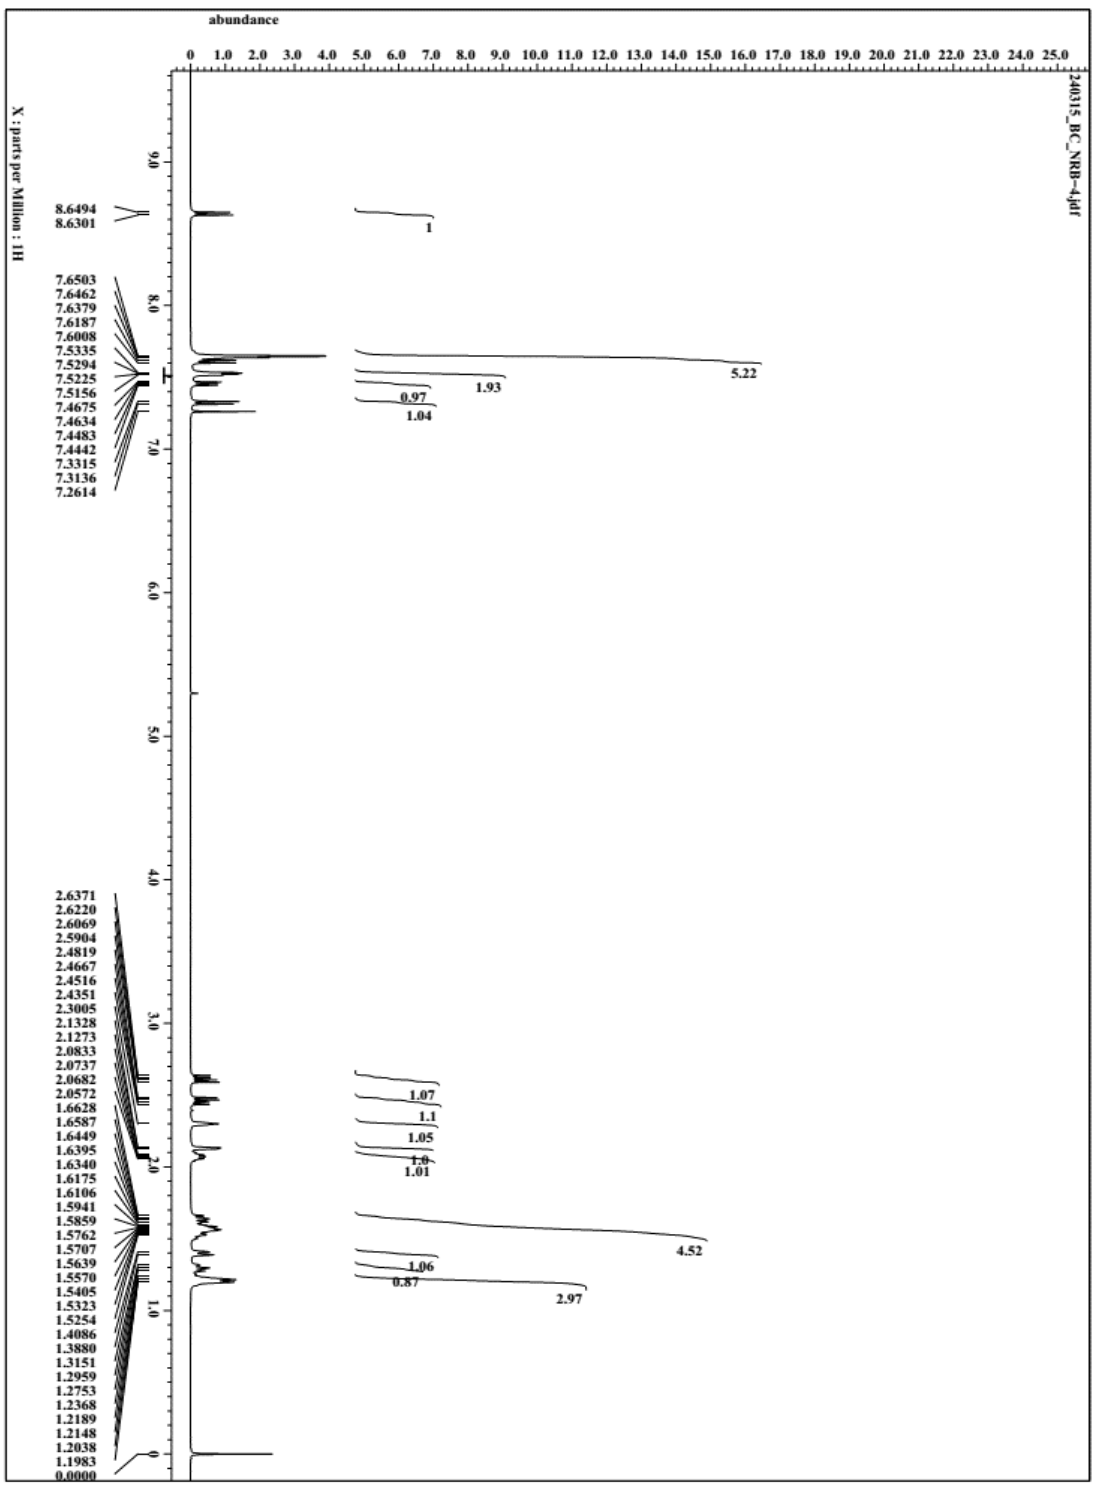

Fig. S20 <sup>1</sup>H-NMR spectrum of Compound 2.

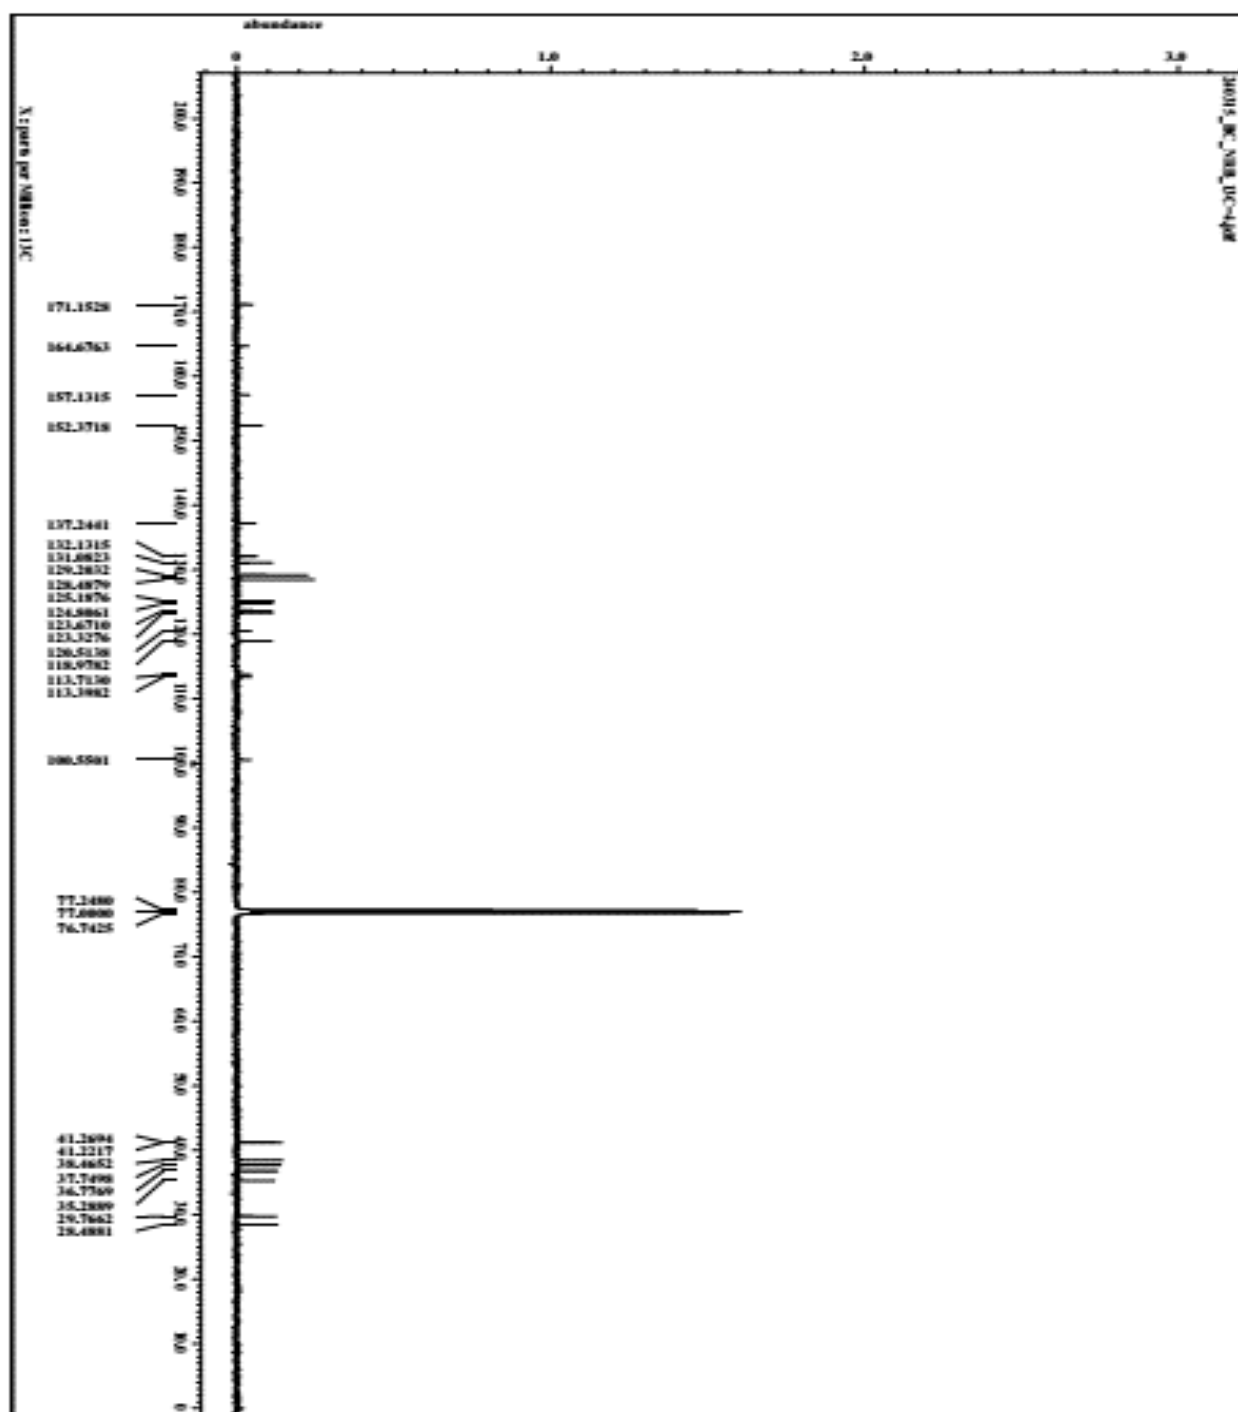

Fig. S21  $^{13}\text{C}$ -NMR spectrum of Compound 2.
